# Supplementary material for: Selective entrainment of the Drosophila circadian clock to daily gradients in environmental temperature
Source: PubMed Central journal article supplement (PMC2745372; doi:10.1186/1741-7007-7-49), 2009-08-11
Supplement: 1741-7007-7-49-S1.pdf [file 1741-7007-7-49-S1.pdf]

**S1**individual  
activity records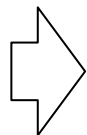median  
activity record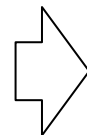mean daily  
activity profile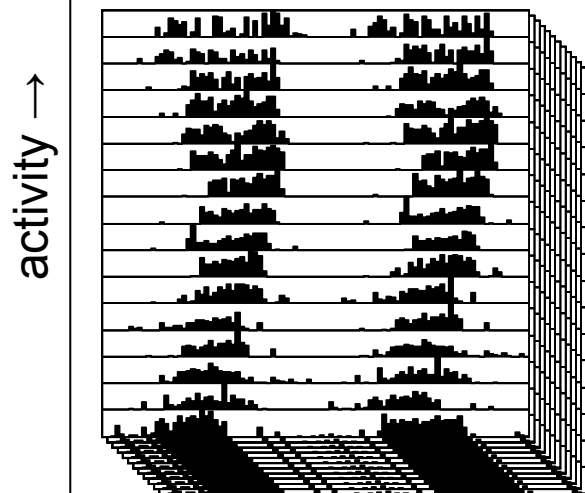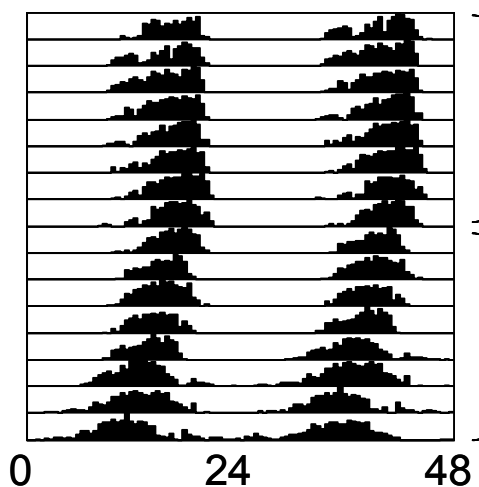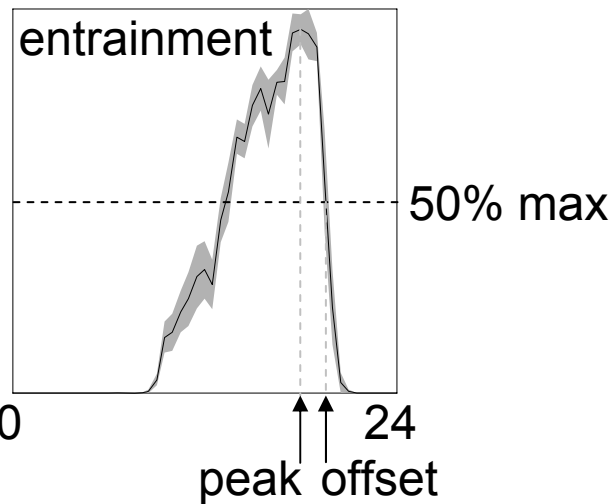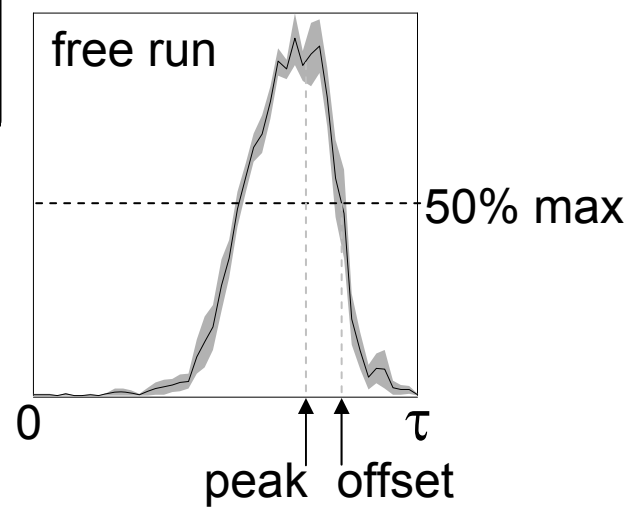

time (h) →
