# Supplementary material for: Selective entrainment of the Drosophila circadian clock to daily gradients in environmental temperature
Source: PubMed Central journal article supplement (PMC2745372; doi:10.1186/1741-7007-7-49), 2009-08-11

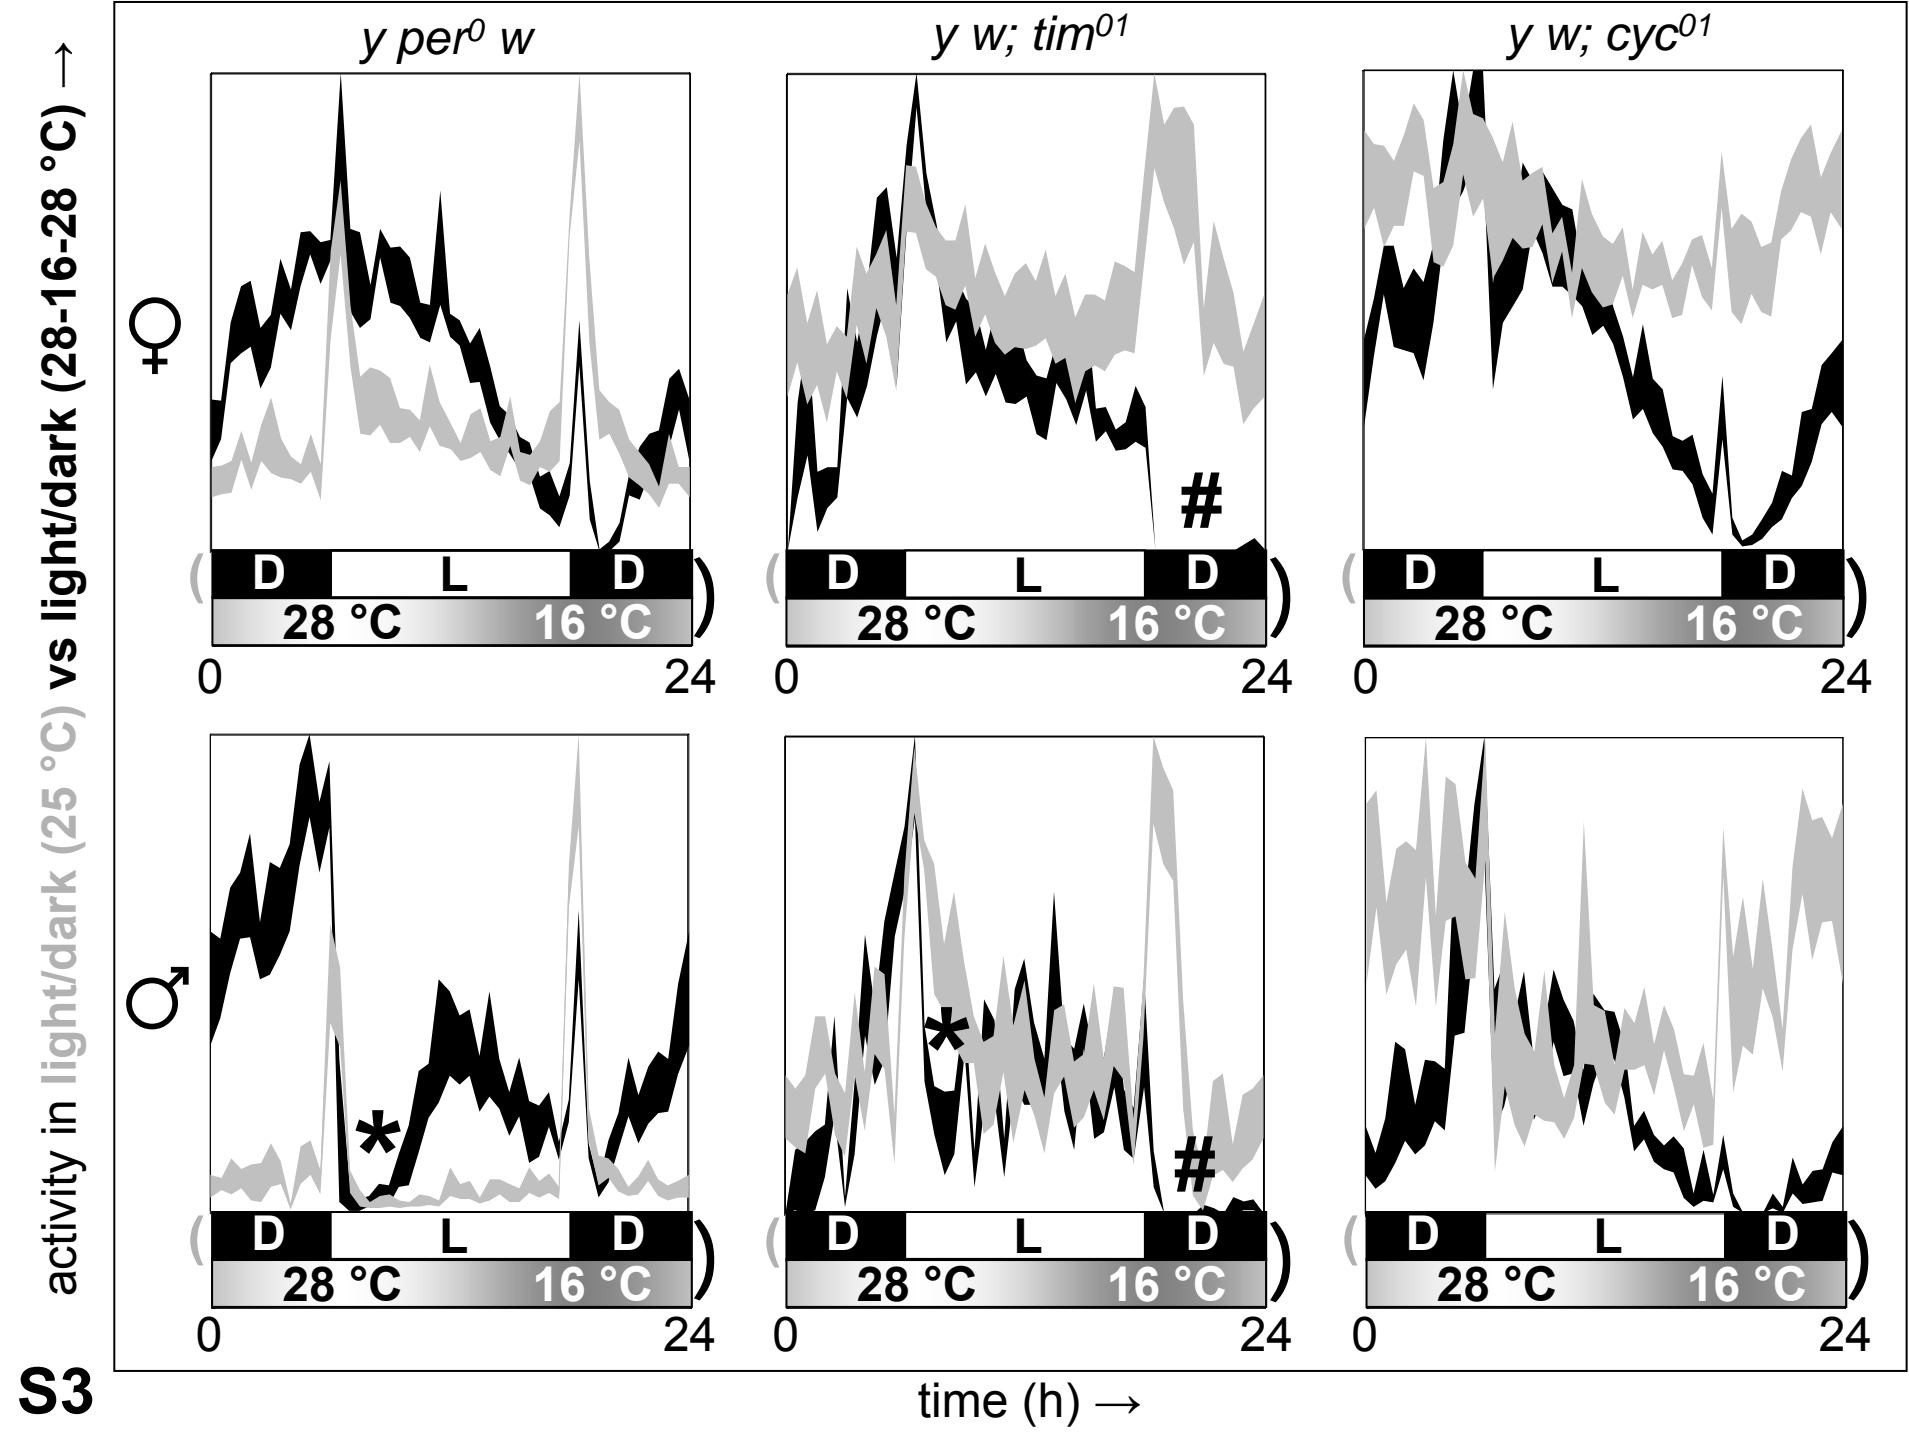

Supplement: 1741-7007-7-49-S4.pdf [file 1741-7007-7-49-S4.pdf]
